# Supplementary material
Source: PubMed Central journal article supplement (PMC4399049)
Supplement: IAI.02833-14_zii999091194so1.pdf [file IAI.02833-14_zii999091194so1.pdf]

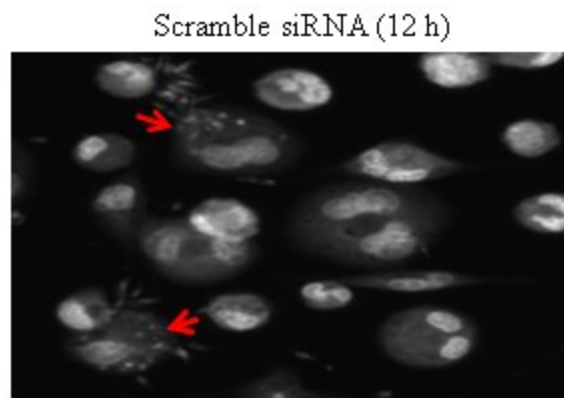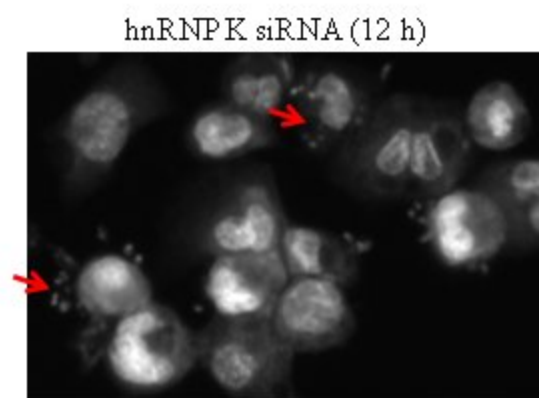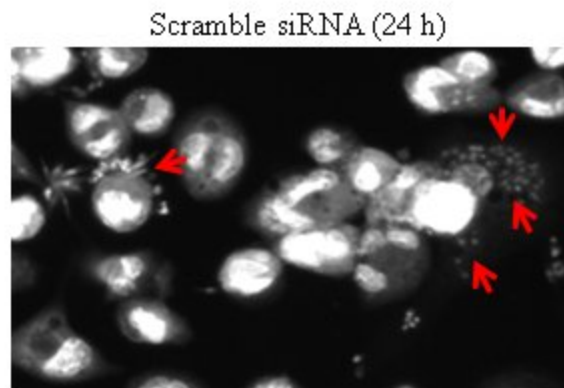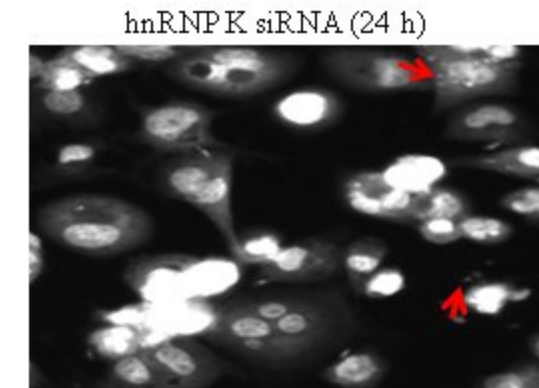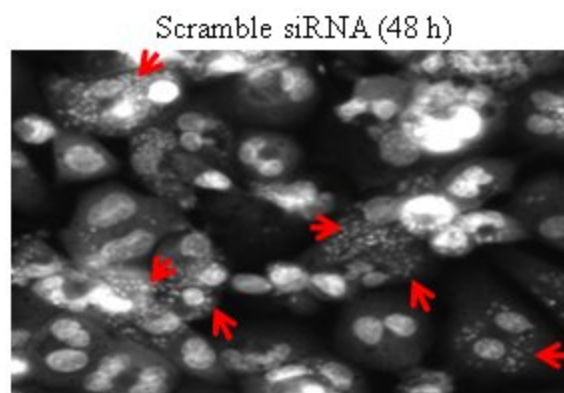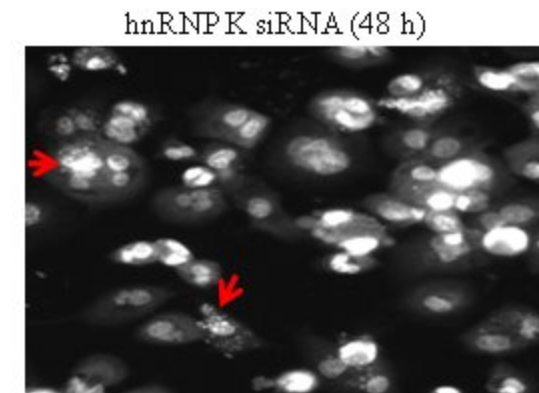

Supplementary Fig. 1: Automated microscopy based images showing effect of knockdown of hnRNP K on infection ratio and intracellular amastigotes at 12 h, 24 h and 48 h respectively.

Scramble siRNA (12 h)

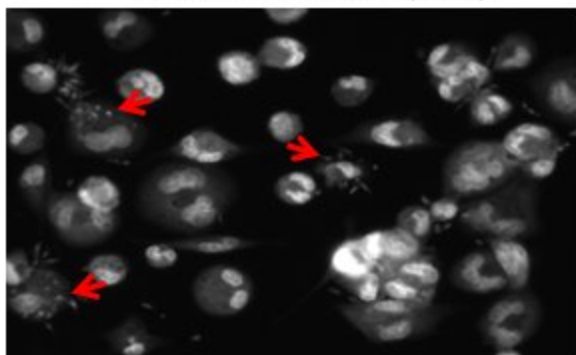

MAVS siRNA (12 h)

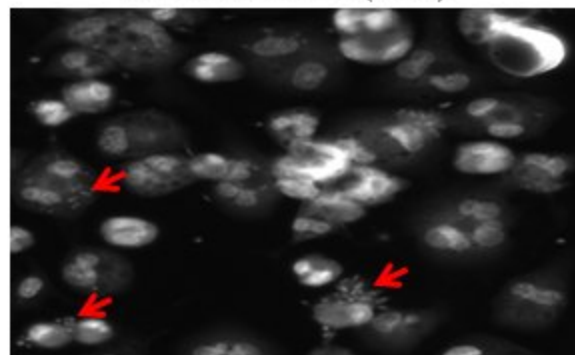

Scramble siRNA (24 h)

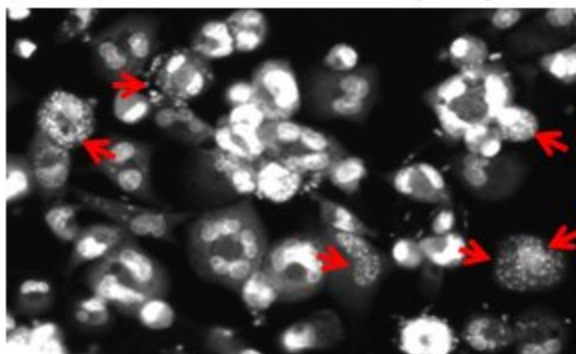

MAVS siRNA (24 h)

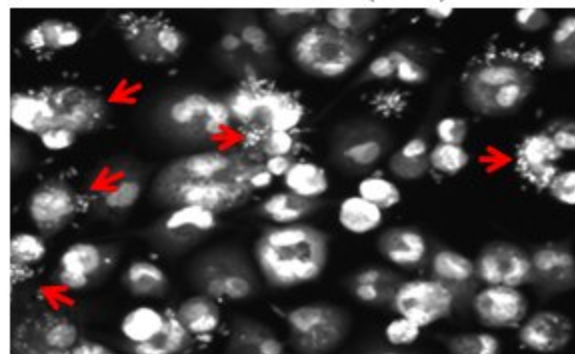

Scramble siRNA (48 h)

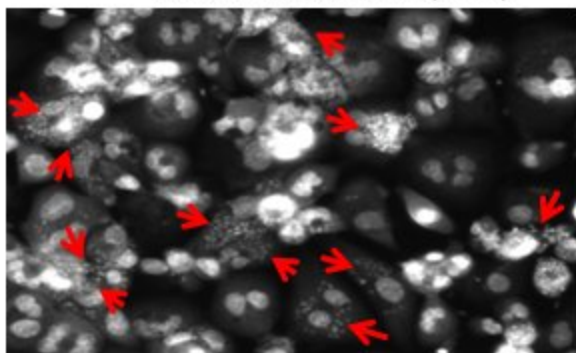

MAVS siRNA (48 h)

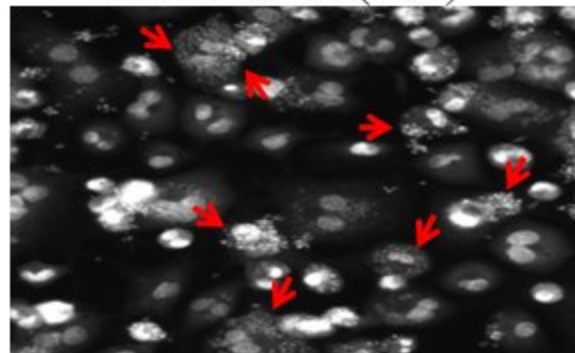

Supplementary Fig. 2: Automated microscopy based images showing effect of knockdown of ARHGEF18 and MAVS on infection ratio and intracellular amastigotes.

Supplementary Table S1: List of iTRAQ labeling reagents used to label the digested peptides originating from different samples used in the study.

| <b>Duration of infection</b> | <b>Experimental Set</b> | <b>Sample type</b>                              | <b>iTRAQ label used</b> |
|------------------------------|-------------------------|-------------------------------------------------|-------------------------|
| 12 h                         | 1/Set A                 | THP-1 Uninfected                                | -114                    |
|                              |                         | THP-1 + <i>L. donovani</i> (MHOM/IN/80/AG83)-C1 | -115                    |
|                              |                         | THP-1 + <i>L. donovani</i> (MHOM/IN/80/AG83)-C2 | -116                    |
|                              | 2/Set B                 | THP-1 Uninfected                                | -114                    |
|                              |                         | THP-1 + <i>L. donovani</i> (MHOM/IN/80/AG83)-C1 | -115                    |
|                              |                         | THP-1 + <i>L. donovani</i> (MHOM/IN/80/AG83)-C2 | -116                    |
|                              | 3/Set C                 | THP-1 Uninfected                                | -114                    |
|                              |                         | THP-1 + <i>L. donovani</i> (MHOM/IN/80/AG83)-C1 | -116                    |
|                              |                         | THP-1 + <i>L. donovani</i> (MHOM/IN/80/AG83)-C2 | -117                    |
| 24 h                         | 1/Set D                 | THP-1 Uninfected                                | -114                    |
|                              |                         | THP-1 + <i>L. donovani</i> (MHOM/IN/80/AG83)-C1 | -115                    |
|                              |                         | THP-1 + <i>L. donovani</i> (MHOM/IN/80/AG83)-C2 | -116                    |
|                              | 2/Set E                 | THP-1 Uninfected                                | -114                    |
|                              |                         | THP-1 + <i>L. donovani</i> (MHOM/IN/80/AG83)-C1 | -115                    |
|                              |                         | THP-1 + <i>L. donovani</i> (MHOM/IN/80/AG83)-C2 | -116                    |
|                              | 3/Set F                 | THP-1 Uninfected                                | -114                    |
|                              |                         | THP-1 + <i>L. donovani</i> (MHOM/IN/80/AG83)-C1 | -115                    |
|                              |                         | THP-1 + <i>L. donovani</i> (MHOM/IN/80/AG83)-C2 | -117                    |
| 48 h                         | 1/Set G                 | THP-1 Uninfected                                | -114                    |
|                              |                         | THP-1 + <i>L. donovani</i> (MHOM/IN/80/AG83)-C1 | -115                    |
|                              |                         | THP-1 + <i>L. donovani</i> (MHOM/IN/80/AG83)-C2 | -116                    |
|                              | 2/Set H                 | THP-1 Uninfected                                | -114                    |
|                              |                         | THP-1 + <i>L. donovani</i> (MHOM/IN/80/AG83)-C1 | -115                    |
|                              |                         | THP-1 + <i>L. donovani</i> (MHOM/IN/80/AG83)-C2 | -116                    |
|                              |                         |                                                 | THP-1 Uninfected        |

|  |         |                                                 |      |
|--|---------|-------------------------------------------------|------|
|  | 3/Set I | THP-1 + <i>L. donovani</i> (MHOM/IN/80/AG83)-C1 | -116 |
|  |         | THP-1 + <i>L. donovani</i> (MHOM/IN/80/AG83)-C2 | -117 |

C1: Clone 1; C2: Clone 2

Supplementary Table S2: List of gene IDs, gene names, primer sequences and amplicon size in qRT-PCR based gene expression analyses

| <b>Gene ID</b> | <b>Gene*</b> | <b>Primer Sequence 5'-3'</b> | <b>Amplicon Size (bp)</b> |
|----------------|--------------|------------------------------|---------------------------|
| 3190           | hnRNP K F    | TAAAATCAAAGAACTTCGAGAGAAC    | 87                        |
|                | hnRNP K R    | AGAACAACCTCTGTCAGTGGAATGA    |                           |
| 220988         | hnRNP A3 F   | TTGTGACTTATTCTTGTGTTGAAGAG   | 77                        |
|                | hnRNP A3 R   | CACTACACGCCCATCAACCTT        |                           |
| 3184           | hnRNP D F    | GTTTTGGTGAGGTGGAATCCA        | 69                        |
|                | hnRNP D R    | AGCAGAACCCACGCCTCTTA         |                           |
| 3309           | GRP78 F      | CGGCCGCACGTGGAATG            | 57                        |
|                | GRP78 R      | TTGAACGGCAAGAACTTGATGT       |                           |
| 7431           | VIM F        | AATGACCGCTTCGCCAACT          | 59                        |
|                | VIM R        | ATCTTATTCTGCTGCTCCAGGAA      |                           |
| 26827          | RNU6A F      | CTCGCTTCGGCAGCACATATAC       | 101                       |
|                | RNU6A R      | AATATGGAACGCTTCACGAATTTG     |                           |

\*hnRNP K (Heterogeneous nuclear ribonucleoprotein K), hnRNP A3 (Heterogeneous nuclear ribonucleoprotein A3), hnRNP D (Heterogeneous nuclear ribonucleoprotein D), GRP78 (Glucose-regulated protein, 78 kDa), VIM (Vimentin), RNU6A (U6 Small RNA).

F; forward, R; reverse.

Supplementary Table S3: Gene name, accession numbers and Oligo (siRNA) sequences\* used in the gene knockdown experiments

| Gene Name | Gene ID | Accession Number | siRNA Sequences     |
|-----------|---------|------------------|---------------------|
| hnRNP K   | 3190    | NM_031263        | UAAACGCCCUGCAGAAGAU |
|           |         |                  | GGUCGUGGCUCAUAUGGUG |
|           |         |                  | UGACAGAGUUGUUCUUAU  |
|           |         |                  | GCAAGAAUAUUAAGGCUCU |
| MAVS      | 57506   | NM_020746        | AAGUAUAUCUGCCGCAAUU |
|           |         |                  | CAUCCAAAGUGCCUACUAG |
|           |         |                  | GCAAUGUGGAUGUUGUAGA |
|           |         |                  | CAUCCAAUUGCCCAUCA   |
| ARHGEF18  | 23370   | NM_015318        | UCAGGGCGCUUGAAAGAU  |
|           |         |                  | GCAGUGACCGGAAUUAUGU |
|           |         |                  | CACAACGCAUAACCAAUA  |
|           |         |                  | GGACGCAACUCGGACCAAU |

hnRNP K (Heterogeneous nuclear ribonucleoprotein K), MAVS (Mitochondrial anti-viral signaling protein), ARHGEF18 (Rho guanine nucleotide exchange factor 18)

\*Pool mixture of 4 siRNA Oligos were used in the study

Supplementary Table S5: List of differentially modulated proteins in THP-1 cells infected with *Leishmania donovani* when compared to uninfected cells at 12 h, 24 h and 48 h after *Leishmania* infection.

| N                                                                                                                                                  | Uniprot ID | Name                                                    | Biological Process                             | 12 h                  |   | 24 h                  |   | 48 h                  |   |
|----------------------------------------------------------------------------------------------------------------------------------------------------|------------|---------------------------------------------------------|------------------------------------------------|-----------------------|---|-----------------------|---|-----------------------|---|
|                                                                                                                                                    |            |                                                         |                                                | Fold<br>( $\pm$ SD)   | R | Fold<br>( $\pm$ SD)   | R | Fold<br>( $\pm$ SD)   | R |
| Transport, vesicular trafficking, signal transduction, apoptosis, cell death and differentiation, stress related, inflammation and immune response |            |                                                         |                                                |                       |   |                       |   |                       |   |
| Transport and vesicular trafficking                                                                                                                |            |                                                         |                                                |                       |   |                       |   |                       |   |
| 1                                                                                                                                                  | P00918     | Carbonic anhydrase 2                                    | bicarbonate transport                          | 0.82<br>( $\pm$ 0.08) | 3 | 0.40<br>( $\pm$ 0.09) | 3 | 1.03<br>( $\pm$ 0.26) | 2 |
| 2                                                                                                                                                  | P02794     | Ferritin heavy chain                                    | iron ion transport                             | 0.85<br>( $\pm$ 0.09) | 2 | 0.59<br>( $\pm$ 0.11) | 2 | 0.99<br>( $\pm$ 0.00) | 2 |
| 3                                                                                                                                                  | P22307     | Non-specific lipid-transfer protein                     | lipid transport                                | 0.85<br>( $\pm$ 0.02) | 3 | 0.58<br>( $\pm$ 0.26) | 3 | 0.99<br>( $\pm$ 0.00) | 2 |
| 4                                                                                                                                                  | O00299     | Chloride intracellular channel protein 1                | regulation of mitochondrial membrane potential | 0.99<br>( $\pm$ 0)    | 3 | 1.07<br>( $\pm$ 0.14) | 3 | 0.51<br>( $\pm$ 0.36) | 3 |
| 5                                                                                                                                                  | Q14974     | Importin subunit beta-1                                 | NLS-bearing substrate import into nucleus      | 0.98<br>( $\pm$ 0.46) | 2 | 0.99<br>( $\pm$ 0)    | 2 | 0.42<br>( $\pm$ 0.12) | 2 |
| 6                                                                                                                                                  | Q13428     | Treacle protein                                         | Transport                                      | 2.27<br>( $\pm$ 0.20) | 2 | 0.94<br>( $\pm$ 0.15) | 3 |                       |   |
| 7                                                                                                                                                  | P11686     | Pulmonary surfactant-associated protein C               | respiratory gaseous exchange                   | 9.9<br>( $\pm$ 5.87)  | 2 |                       |   |                       |   |
| 8                                                                                                                                                  | Q02641     | Voltage-dependent L-type calcium channel subunit beta-1 | high voltage-gated calcium channel activity    |                       |   | 1.76<br>( $\pm$ 0.29) | 2 |                       |   |
| 9                                                                                                                                                  | Q8IWI2     | GRIP and coiled-coil domain-containing protein 2        | late endosome to Golgi transport               |                       |   | 0.52<br>( $\pm$ 0.02) | 2 |                       |   |
| 10                                                                                                                                                 | Q12797     | Aspartyl/asparaginyl beta-                              | activation of store-                           |                       |   |                       |   | 0.34                  | 2 |

|                     |        | hydroxylase                                              | operated calcium channel activity                                    | (±0.2)           |   |                  |   |                  |   |
|---------------------|--------|----------------------------------------------------------|----------------------------------------------------------------------|------------------|---|------------------|---|------------------|---|
| Signal transduction |        |                                                          |                                                                      |                  |   |                  |   |                  |   |
| 11                  | Q01518 | Adenylyl cyclase-associated protein 1                    | activation of adenylyl cyclase activity                              | 0.93<br>(± 0.01) | 3 | 0.44<br>(± 0.21) | 3 | 0.25<br>(± 0.01) | 3 |
| 12                  | P31946 | 14-3-3 protein beta/alpha                                | MAPK cascade                                                         | 1.23<br>(± 0.05) | 3 | 0.49<br>(± 0.34) | 3 | 0.61<br>(± 0.45) | 2 |
| 13                  | Q8TEY5 | cAMP-responsive element-binding protein 3-like protein 4 | positive regulation of transcription from RNA polymerase II promoter | 15.3<br>(± 1.98) | 3 |                  |   |                  |   |
| 14                  | P80303 | Nucleobindin-2                                           | endoplasmic reticulum-Golgi intermediate compartment                 | 0.99<br>(± 0)    | 2 |                  |   | 1.96<br>(± 0.06) | 2 |
| 15                  | P63104 | 14-3-3 protein zeta/delta                                | intrinsic apoptotic signaling pathway                                | 0.96<br>(± 0.09) | 3 | 1.5<br>(± 0.46)  | 3 | 0.96<br>(± 0.01) | 3 |
| 16                  | P35613 | Basigin                                                  | cell surface receptor signaling pathway                              | 0.96<br>(±0.01)  | 2 | 0.65<br>(±0.01)  | 2 |                  |   |
| 17                  | Q9Y3L3 | SH3 domain-binding protein 1                             | positive regulation of GTPase activity                               | 1.62<br>(± 0.01) | 2 |                  |   |                  |   |
| 18                  | Q9ULV4 | Coronin-1C                                               | actin cytoskeleton organization                                      | 2.28<br>(± 1.03) | 2 |                  |   | 0.84<br>(± 0.06) | 2 |
| 19                  | Q13546 | Receptor-interacting serine/threonine-protein kinase 1   | TRIF-dependent toll-like receptor signaling pathway                  |                  |   | 3.06<br>(± 0.94) | 2 |                  |   |
| 20                  | Q14160 | Protein LAP4                                             | activation of Rac GTPase activity                                    |                  |   | 2.04<br>(± 0.96) | 2 |                  |   |
| 21                  | O95294 | RasGAP-activating-like protein 1                         | negative regulation of Ras protein signal transduction               |                  |   | 0.56<br>(±0.14)  | 2 |                  |   |



|                                           |        |                                                  |                                                                                  |                  |   |                  |   |                  |   |
|-------------------------------------------|--------|--------------------------------------------------|----------------------------------------------------------------------------------|------------------|---|------------------|---|------------------|---|
| 22                                        | P27348 | 14-3-3 protein theta                             | intrinsic apoptotic signaling pathway                                            |                  |   | 0.55<br>(± 0.05) | 2 | 1.0<br>(± 0.07)  | 2 |
| 23                                        | O43572 | A kinase anchor protein 10, mitochondrial        | termination of G-protein coupled receptor signaling pathway                      |                  |   | 1.7<br>(± 0.48)  | 2 |                  |   |
| 24                                        | P50395 | Rab GDP dissociation inhibitor beta              | regulation of small GTPase mediated signal transduction                          |                  |   | 0.63<br>(± 0.04) | 3 | 0.50<br>(± 0.1)  | 2 |
| 25                                        | P29350 | Tyrosine-protein phosphatase non-receptor type 6 | JAK-STAT cascade involved in growth hormone signaling pathway                    |                  |   |                  |   | 0.22<br>(±0.005) | 2 |
| 26                                        | P49006 | MARCKS-related protein                           | positive regulation of cell proliferation                                        | 1.22<br>(±1.41)  | 2 | 0.82<br>(±0.29)  | 3 | 0.61<br>(±0.47)  | 2 |
| Apoptosis, cell death and differentiation |        |                                                  |                                                                                  |                  |   |                  |   |                  |   |
| 27                                        | P11021 | 78 kDa glucose-regulated protein                 | ER overload response                                                             | 0.43<br>(± 0.04) | 3 | 1.03<br>(± 0.16) | 3 | 1.95<br>(± 0.38) | 3 |
| 28                                        | P14625 | Endoplasmic reticulum protein                    | ER-associated protein catabolic process                                          | 0.58<br>(±0.10)  | 3 | 1.02<br>(±0.02)  | 3 | 1.17<br>(±0.14)  | 3 |
| 29                                        | P38646 | Stress-70 protein, mitochondrial                 | ER-associated protein catabolic process                                          | 0.58<br>(±0.07)  | 3 | 0.98<br>(±0.03)  | 3 | 1.09<br>(±0.02)  | 3 |
| 30                                        | P04040 | Catalase                                         | hydrogen peroxide catabolic process                                              | 0.54<br>(± 0.05) | 3 | 1.05<br>(± 0.03) | 3 | 0.98<br>(± 0.01) | 3 |
| 31                                        | P61604 | 10 kDa heat shock protein, mitochondrial         | activation of cysteine-type endopeptidase activity involved in apoptotic process | 0.59<br>(± 0.05) | 3 | 0.84<br>(± 0.12) | 3 | 1.9<br>(± 0.88)  | 3 |
| 31                                        | P08107 | Heat shock 70 kDa protein 1                      | negative regulation of apoptotic process                                         | 1.04<br>(±0.02)  | 3 | 1.07<br>(±0.10)  | 3 | 0.93<br>(±0.09)  | 3 |

|                                                           |        |                                           |                                                                         |                  |   |                  |   |                  |   |
|-----------------------------------------------------------|--------|-------------------------------------------|-------------------------------------------------------------------------|------------------|---|------------------|---|------------------|---|
| 33                                                        | P06748 | Nucleophosmin                             | CENP-A containing nucleosome assembly at centromere                     | 1.53<br>(± 0.31) | 3 | 1.09<br>(± 0.03) | 3 | 1.93<br>(± 0.16) | 3 |
| 34                                                        | P00441 | Superoxide dismutase [Cu-Zn]              | hydrogen peroxide biosynthetic process                                  | 0.99<br>(±0.00)  | 3 | 0.88<br>(±0.13)  | 3 | 0.7<br>(±0.01)*  | 2 |
| 35                                                        | P04179 | Superoxide dismutase [Mn], mitochondrial  | hydrogen peroxide biosynthetic process                                  | 0.97<br>(± 0.07) | 3 | 0.57<br>(± 0.13) | 3 | 2.01<br>(± 0.22) | 3 |
| 36                                                        | Q9Y2B0 | Protein canopy homolog 2                  | negative regulation of gene expression                                  | 0.99<br>(±0.00)  | 2 | 0.60<br>(±0.01)  | 2 |                  |   |
| 37                                                        | P08670 | Vimentin                                  | cellular component disassembly involved in execution phase of apoptosis | 0.58<br>(± 0.16) | 3 | 1.74<br>(± 0.55) | 3 | 2.19<br>(± 0.10) | 3 |
| 38                                                        | P17096 | High mobility group protein HMG-I/HMG-Y   | DNA unwinding involved in replication                                   | 1.56<br>(± 0.07) | 3 | 3.54<br>(± 0.1)  | 3 | 5.74<br>(± 0.34) | 3 |
| 39                                                        | Q6ZSZ5 | Rho guanine nucleotide exchange factor 18 | apoptotic signaling pathway                                             | 3.6<br>(± 0.93)  | 2 |                  |   |                  |   |
| 40                                                        | P52926 | High mobility group protein HMGI-C        | DNA damage response                                                     | 1.76<br>(± 0.46) | 2 | 3.32<br>(± 0.16) | 3 | 9.58<br>(± 0.12) | 3 |
| 41                                                        | P08758 | Annexin A5                                | negative regulation of apoptotic process                                |                  |   | 0.34<br>(± 0.13) | 3 | 0.35<br>(± 0.12) | 2 |
| 42                                                        | P14222 | Perforin-1                                | apoptotic process                                                       |                  |   | 1.75<br>(± 0.7)  | 2 |                  |   |
| 43                                                        | Q9UKY  | Protein CDV3 homolog                      | Cell proliferation                                                      |                  |   | 1.57<br>(± 0.62) | 2 | 1<br>(± 0.05)    | 2 |
| Stress related proteins, inflammation and immune response |        |                                           |                                                                         |                  |   |                  |   |                  |   |
| Cell redox homeostasis                                    |        |                                           |                                                                         |                  |   |                  |   |                  |   |
| 44                                                        | P07237 | Protein disulfide-isomerase               | cell redox homeostasis                                                  | 0.46<br>(± 0.04) | 3 | 1.31<br>(± 0.31) | 3 | 3.98<br>(± 2.37) | 3 |

|                           |        |                                                         |                                                                                |                   |   |                   |   |                  |   |
|---------------------------|--------|---------------------------------------------------------|--------------------------------------------------------------------------------|-------------------|---|-------------------|---|------------------|---|
| 45                        | P30101 | Protein disulfide-isomerase A3                          | cell redox homeostasis                                                         | 0.8<br>(± 0.05)   | 3 | 2.43<br>(± 0.9)   | 3 | 1.06<br>(± 0.08) | 3 |
| 46                        | Q15084 | Protein disulfide-isomerase A6                          | activation of signaling protein activity involved in unfolded protein response | 0.51<br>(± 0.05)  | 3 | 1.03<br>(± 0.01)  | 3 | 1.01<br>(± 0.24) | 2 |
| 47                        | P13667 | Protein disulfide-isomerase A4                          | cell redox homeostasis                                                         | 0.52<br>(± 0.14)  | 3 | 1.0<br>(± 0.03)   | 3 | 1.15<br>(± 0.05) | 3 |
| 48                        | Q8NBS9 | Thioredoxin domain-containing protein 5                 | cell redox homeostasis                                                         | 0.99<br>(± 0)     | 2 | 0.4<br>(± 0.02)   | 2 |                  |   |
| 49                        | Q9BS26 | Thioredoxin domain-containing protein 4                 | cell redox homeostasis                                                         | 0.82<br>(± 0.12)  | 2 | 0.57<br>(± 0.007) | 2 |                  |   |
| 50                        | O95881 | Thioredoxin domain-containing protein 12                | cell redox homeostasis                                                         | 0.99<br>(± 0)     | 2 | 0.29<br>(± 0.01)  | 2 |                  |   |
| 51                        | Q9H299 | SH3 domain-binding glutamic acid-rich-like protein 3    | cell redox homeostasis                                                         |                   |   | 1.07<br>(± 0.09)  | 2 | 0.65<br>(± 0.00) | 2 |
| Oxidative stress response |        |                                                         |                                                                                |                   |   |                   |   |                  |   |
| 52                        | P09211 | Glutathione S-transferase P                             | glutathione metabolic process                                                  |                   |   | 1.46<br>(± 0.5)   | 3 | 0.62<br>(± 0.02) | 2 |
| 53                        | Q9Y4L1 | Hypoxia up-regulated protein 1                          | activation of signaling protein activity involved in unfolded protein response | 0.62<br>(± 0.02)  | 3 | 1.26<br>(± 0.18)  | 3 | 0.96<br>(± 0.09) | 3 |
| 54                        | P30048 | Thioredoxin-dependent peroxide reductase, mitochondrial | hydrogen peroxide catabolic process                                            | 0.68<br>(± 0.06)* | 3 | 1.01<br>(± 0.04)  | 3 | 0.87<br>(± 0.2)  | 3 |
| Immune response           |        |                                                         |                                                                                |                   |   |                   |   |                  |   |
| 55                        | Q7Z434 | Mitochondrial antiviral-signaling protein               | activation of innate immune response                                           | 7.86<br>(± 3.55)  | 2 |                   |   |                  |   |

|                                                                   |        |                                 |                                                     |                  |   |                   |   |                  |   |
|-------------------------------------------------------------------|--------|---------------------------------|-----------------------------------------------------|------------------|---|-------------------|---|------------------|---|
| 56                                                                | P01584 | Interleukin-1 beta              | cytokine-mediated signaling pathway                 | 0.75<br>(± 0.45) | 2 | 0.55<br>(± 0.03)  | 2 |                  |   |
| 57                                                                | P09960 | Leukotriene A-4 hydrolase       | arachidonic acid metabolic process                  |                  |   | 1.72<br>(± 0.46)  | 2 |                  |   |
| 58                                                                | Q13740 | CD166 antigen                   | cell adhesion                                       |                  |   |                   |   | 1.71<br>(± 0.12) | 2 |
| 59                                                                | P36222 | Chitinase-3-like protein 1      | activation of NF-kappaB-inducing kinase activity    |                  |   | 0.53<br>(± 0)     | 2 | 0.97<br>(± 0.04) | 2 |
| DNA metabolism (DNA repair, replication and chromatin remodeling) |        |                                 |                                                     |                  |   |                   |   |                  |   |
| Nucleobase, nucleoside and nucleotide metabolism                  |        |                                 |                                                     |                  |   |                   |   |                  |   |
| 60                                                                | Q13232 | Nucleoside diphosphate kinase 3 | CTP biosynthetic process                            | 2.59<br>(± 0.08) | 2 |                   |   |                  |   |
| 61                                                                | P15531 | Nucleoside diphosphate kinase A | CTP biosynthetic process                            |                  |   | 0.41<br>(± 0.005) | 2 | 0.94<br>(± 0.03) | 2 |
| 62                                                                | P19971 | Thymidine phosphorylase         | pyrimidine nucleobase metabolic process             |                  |   | 1.11<br>(± 0.68)  | 2 | 0.54<br>(± 0.12) | 2 |
| Histones and chromatin remodeling                                 |        |                                 |                                                     |                  |   |                   |   |                  |   |
| 63                                                                | P62805 | Histone H4                      | CENP-A containing nucleosome assembly at centromere | 1.62<br>(± 0.28) | 3 | 5.51<br>(± 2.94)  | 3 | 13.6<br>(± 3.23) | 3 |
| 64                                                                | Q99880 | Histone H2B type 1-L            | nucleosome assembly                                 | 1.62<br>(± 0.3)  | 2 | 0.94<br>(± 0.07)  | 3 | 19.5<br>(± 7.56) | 2 |
| 65                                                                | P19338 | Nucleolin                       | Transcription regulation                            | 1.46<br>(± 0.43) | 3 | 3.23<br>(± 2.3)   | 3 | 1<br>(± 0.02)    | 3 |
| 66                                                                | Q92522 | Histone H1x                     | nucleosome assembly                                 | 0.99<br>(± 0)    | 2 | 2.07<br>(± 0.48)  | 2 | 0.9<br>(± 0.54)  | 2 |
| 67                                                                | Q9BTM1 | Histone H2A.J                   | nucleosome assembly                                 | 0.93<br>(± 0.07) | 2 |                   |   | 6.53<br>(± 3.18) | 2 |

|    |        |                                             |                         |                  |   |                  |   |                   |   |
|----|--------|---------------------------------------------|-------------------------|------------------|---|------------------|---|-------------------|---|
| 68 | Q93079 | Histone H2B type 1-H                        | nucleosome assembly     | 2.89<br>(± 2.49) | 2 |                  |   |                   |   |
| 69 | Q99878 | Histone H2A type 1-J                        | nucleosome assembly     | 1.23<br>(± 1.46) | 2 | 4.52<br>(± 4.33) | 2 |                   |   |
| 70 | Q99879 | Histone H2B type 1-M                        | nucleosome assembly     |                  |   | 14.5<br>(± 13.0) | 2 |                   |   |
| 71 | P84243 | Histone H3.3                                | nucleosome assembly     |                  |   | 1.87<br>(± 1.32) | 3 |                   |   |
| 72 | Q01105 | Protein SET                                 | DNA replication         |                  |   | 1.96<br>(± 0.06) | 2 |                   |   |
| 73 | O75367 | Core histone macro-H2A.1                    | nucleosome assembly     |                  |   | 2.44<br>(± 1.53) | 2 | 6.07<br>(± 2.74)  | 2 |
| 74 | P05204 | Non-histone chromosomal protein HMG-17      | chromatin organization  |                  |   | 3.6<br>(± 0.02)  | 2 |                   |   |
| 75 | Q5SSJ5 | Heterochromatin protein 1-binding protein 3 | nucleosome assembly     |                  |   | 1.68<br>(± 0.24) | 2 |                   |   |
| 76 | Q96L91 | E1A-binding protein p400                    | histone H2A acetylation |                  |   | 1.46<br>(± 0.34) | 2 |                   |   |
| 77 | P04908 | Histone H2A type 1-B/E                      | nucleosome assembly     |                  |   | 1.95<br>(±0.92)  | 2 |                   |   |
| 78 | P16104 | Histone H2A.x                               | nucleosome assembly     |                  |   | 4.23<br>(±3.34)  | 2 |                   |   |
| 79 | Q71DI3 | Histone H3.2                                | nucleosome assembly     |                  |   | 3.45<br>(± 1.76) | 2 |                   |   |
| 80 | Q6FI13 | Histone H2A type 2-A                        | nucleosome assembly     |                  |   |                  |   | 4<br>(± 2.24)     | 2 |
| 81 | O60814 | Histone H2B type 1-K                        | nucleosome assembly     |                  |   |                  |   | 20.18<br>(± 6.33) | 2 |

| DNA repair and replication                                 |        |                                                    |                                                           |                  |   |                   |   |                   |   |
|------------------------------------------------------------|--------|----------------------------------------------------|-----------------------------------------------------------|------------------|---|-------------------|---|-------------------|---|
| 82                                                         | P13010 | ATP-dependent DNA helicase 2 subunit 2             | DNA recombination                                         | 0.89<br>(± 0.1)  | 3 | 3.16<br>(± 0.61)  | 2 | 0.91<br>(± 0.02)  | 2 |
| 83                                                         | Q04837 | Single-stranded DNA-binding protein, mitochondrial | DNA replication                                           |                  |   | 0.61<br>(±0.02)   | 2 |                   |   |
| 84                                                         | P11387 | DNA topoisomerase 1                                | DNA replication                                           | 1.02<br>(± 0.07) | 2 | 1.72<br>(± 0.25)  | 3 |                   |   |
| 85                                                         | Q15233 | Non-POU domain-containing octamer-binding protein  | DNA recombination                                         | 1.17<br>(± 0.17) | 2 | 1.72<br>(± 0.88)  | 3 |                   |   |
| 86                                                         | Q9Y230 | RuvB-like 2                                        | DNA recombination                                         |                  |   | 1.45<br>(± 0.28)* | 2 |                   |   |
| RNA metabolism (RNA splicing and transcription regulation) |        |                                                    |                                                           |                  |   |                   |   |                   |   |
| RNA splicing and processing                                |        |                                                    |                                                           |                  |   |                   |   |                   |   |
| 87                                                         | P22626 | Heterogeneous nuclear ribonucleoproteins A2/B1     | RNA transport and mRNA splicing via spliceosome           | 0.89<br>(± 0.04) | 3 | 2.96<br>(± 0.49)  | 3 | 1.0<br>(±0.029)   | 3 |
| 88                                                         | P31943 | Heterogeneous nuclear ribonucleoprotein H          | mRNA splicing via spliceosome                             | 0.98<br>(± 0.24) | 2 | 2<br>(± 0.54)     | 3 | 0.99<br>(± 0.108) | 3 |
| 89                                                         | Q14103 | Heterogeneous nuclear ribonucleoprotein D0         | mRNA splicing via spliceosome                             | 0.71<br>(± 0.08) | 3 | 3.07<br>(± 1.64)  | 3 | 1.08<br>(±0.09)   | 3 |
| 90                                                         | P09651 | Heterogeneous nuclear ribonucleoprotein A1         | RNA export from nucleus and mRNA splicing via spliceosome | 1.17<br>(± 0.26) | 3 | 2.57<br>(± 0.25)  | 2 |                   |   |
| 91                                                         | P61978 | Heterogeneous nuclear ribonucleoprotein K          | mRNA splicing via spliceosome                             | 0.46<br>(± 0.23) | 3 | 2.64<br>(± 0.34)  | 3 | 0.88<br>(± 0.28)  | 3 |
| 92                                                         | Q08211 | ATP-dependent RNA helicase A                       | CRD-mediated mRNA stabilization                           | 1.05<br>(± 0.42) | 2 | 1.27<br>(± 0.27)  | 3 | 1.76<br>(± 0.92)  | 2 |
| 93                                                         | P07910 | Heterogeneous nuclear ribonucleoproteins C1/C2     | mRNA splicing via spliceosome                             | 1.13<br>(± 0.10) | 3 | 2.28<br>(± 1.04)  | 3 | 1.37 ±<br>(0.24)  | 3 |

|                                         |        |                                                                    |                                                                                                     |                  |   |                   |   |                   |   |
|-----------------------------------------|--------|--------------------------------------------------------------------|-----------------------------------------------------------------------------------------------------|------------------|---|-------------------|---|-------------------|---|
| 94                                      | P51991 | Heterogeneous nuclear ribonucleoprotein A3                         | mRNA splicing via spliceosome                                                                       | 0.69<br>(± 0.13) | 2 | 2.79<br>(± 1.16)  | 3 | 1.16 ±<br>(0.15)  | 3 |
| 95                                      | O43390 | Heterogeneous nuclear ribonucleoprotein R                          | mRNA splicing via spliceosome                                                                       | 0.99<br>(± 0)    | 2 | 1.5<br>(± 0.009)  | 2 |                   |   |
| 96                                      | P0C7M2 | Putative heterogeneous nuclear ribonucleoprotein A1-like protein 3 | mRNA splicing via spliceosome                                                                       | 0.53<br>(± 0.04) | 2 | 0.79<br>(± 0.507) | 2 | 0.4<br>(± 0.29)   | 2 |
| 97                                      | Q9BQA1 | Methylosome protein 50                                             | ncRNA metabolic process                                                                             | 0.6<br>(±0.05)   | 2 |                   |   |                   |   |
| 98                                      | P38159 | Heterogeneous nuclear ribonucleoprotein G                          | mRNA splicing via spliceosome                                                                       |                  |   | 10.6<br>(± 8.14)  | 3 | 1.1<br>(± 0.46)   | 2 |
| 99                                      | Q92841 | Probable ATP-dependent RNA helicase DDX17                          | RNA processing                                                                                      |                  |   | 1.46<br>(± 0.009) | 2 |                   |   |
| 100                                     | O43290 | U4/U6.U5 tri-snRNP-associated protein 1                            | RNA processing                                                                                      |                  |   | 1.81<br>(± 0.59)  | 2 |                   |   |
| 101                                     | P35637 | RNA-binding protein FUS                                            | mRNA splicing via spliceosome                                                                       |                  |   | 2.57<br>(± 0.15)  | 2 | 1.13<br>(± 0.007) | 2 |
| 102                                     | P62314 | Small nuclear ribonucleoprotein Sm D1                              | ncRNA metabolic process                                                                             |                  |   | 1.79<br>(± 0.33)  | 2 |                   |   |
| 103                                     | Q9Y333 | U6 snRNA-associated Sm-like protein LSm2                           | exonucleolytic nuclear-transcribed mRNA catabolic process involved in deadenylation-dependent decay |                  |   | 0.56<br>(±0.04)   | 2 |                   |   |
| 104                                     | P52597 | Heterogeneous nuclear ribonucleoprotein F                          | mRNA splicing via spliceosome                                                                       | 0.72<br>(±0.28)  | 2 | 1.09<br>(±0.21)   | 3 | 0.62<br>(±0.03)   | 2 |
| Transcription and cell cycle regulation |        |                                                                    |                                                                                                     |                  |   |                   |   |                   |   |
| 105                                     | P53999 | Activated RNA polymerase II                                        | regulation of                                                                                       | 0.95             | 2 | 2.59              | 3 | 1.39              | 2 |

|                                                                  |        |                                          |                                                                                |                  |   |                  |   |                   |   |
|------------------------------------------------------------------|--------|------------------------------------------|--------------------------------------------------------------------------------|------------------|---|------------------|---|-------------------|---|
|                                                                  |        | transcriptional coactivator p15          | transcription from RNA polymerase II promoter                                  | (± 0.03)         |   | (± 1.52)         |   | (± 0.48)          |   |
| 106                                                              | P80723 | Brain acid soluble protein 1             | negative regulation of transcription                                           | 0.64<br>(± 0.15) | 3 | 5.59<br>(± 2.63) | 3 | 0.95<br>(± 0.05)  | 3 |
| 107                                                              | Q9UIW0 | Ventral anterior homeobox 2              | negative regulation of transcription from RNA polymerase II promoter           | 2.12<br>(± 0.54) | 2 |                  |   |                   |   |
| 108                                                              | P06454 | Prothymosin alpha                        | transcription, DNA-dependent                                                   | 1.55<br>(± 0.3)  | 2 | 1.15<br>(± 0.04) | 2 | 1.05<br>(± 0.25)  | 2 |
| 109                                                              | P14652 | Homeobox protein Hox-B2                  | transcription, DNA-dependent                                                   | 3.01<br>(± 0.68) | 2 |                  |   |                   |   |
| 110                                                              | P09874 | Poly [ADP-ribose] polymerase 1           | DNA damage response                                                            |                  |   | 1.58<br>(± 0.33) | 2 |                   |   |
| 111                                                              | Q96AE4 | Far upstream element-binding protein 1   | positive regulation of gene expression                                         |                  |   | 1.94<br>(± 0.25) | 2 | 1.01<br>(± 0.006) | 2 |
| 112                                                              | Q7Z7A1 | Centriolin                               | G2/M transition of mitotic cell cycle                                          |                  |   | 2.24<br>(± 0.02) | 2 |                   |   |
| 113                                                              | Q14814 | Myocyte-specific enhancer factor 2D      | positive regulation of transcription from RNA polymerase II promoter           |                  |   |                  |   | 1.72<br>(± 0.02)  | 2 |
| Protein metabolism (protein folding, modification and synthesis) |        |                                          |                                                                                |                  |   |                  |   |                   |   |
| Protein folding                                                  |        |                                          |                                                                                |                  |   |                  |   |                   |   |
| 114                                                              | P10809 | 60 kDa heat shock protein, mitochondrial | 'de novo' protein folding                                                      | 0.53<br>(± 0.08) | 3 | 0.67<br>(± 0.03) | 3 | 1.54<br>(± 0.45)  | 3 |
| 115                                                              | P27797 | Calreticulin                             | activation of signaling protein activity involved in unfolded protein response | 0.42<br>(± 0.06) | 3 | 0.93<br>(± 0.09) | 3 | 0.57<br>(± 0.29)  | 3 |



|                                      |        |                                                 |                                                                                   |                  |   |                   |   |                  |   |
|--------------------------------------|--------|-------------------------------------------------|-----------------------------------------------------------------------------------|------------------|---|-------------------|---|------------------|---|
| 116                                  | P23284 | Peptidyl-prolyl cis-trans isomerase B           | protein folding                                                                   | 0.96<br>(± 0.06) | 3 | 0.55<br>(± 0.14)  | 3 | 1.01<br>(± 0.09) | 3 |
| 117                                  | P27824 | Calnexin                                        | antigen processing and presentation of exogenous peptide antigen via MHC class II | 0.43<br>(± 0.13) | 3 | 1.05<br>(± 0.25)  | 2 |                  |   |
| 118                                  | P50454 | Serpin H1                                       | response to unfolded protein                                                      | 1.07<br>(±0.16)  | 3 | 0.56<br>(±0.26)   | 3 | 1.28<br>(±0.26)  | 3 |
| Protein modification and proteolysis |        |                                                 |                                                                                   |                  |   |                   |   |                  |   |
| 119                                  | P22314 | Ubiquitin-like modifier-activating enzyme 1     | cell death                                                                        | 0.96<br>(± 0.18) | 2 | 0.43<br>(± 0.08)  | 3 | 0.55<br>(± 0.36) | 3 |
| 120                                  | Q14697 | Neutral alpha-glucosidase AB                    | post-translational protein modification                                           | 0.56<br>(±0.08)  | 3 | 1.02<br>(±0.03)   | 3 | 1.36<br>(±0.09)  | 3 |
| 121                                  | P62988 | Ubiquitin                                       | Protein turnover                                                                  | 0.69<br>(±0.09)  | 3 | 1.43<br>(±0.19)   | 3 | 0.78<br>(±0.12)  | 3 |
| 122                                  | O60888 | Protein CutA                                    | protein localization                                                              | 1.14<br>(± 0.86) | 2 | 1.97<br>( ± 1.72) | 2 |                  |   |
| 123                                  | O75439 | Mitochondrial-processing peptidase subunit beta | cellular protein metabolic process                                                |                  |   |                   |   | 1.82<br>(± 0.09) | 2 |
| 124                                  | P49903 | Selenide, water dikinase 1                      | cellular protein modification process                                             |                  |   |                   |   | 0.51<br>(± 0.17) | 2 |
| Protein synthesis and targeting      |        |                                                 |                                                                                   |                  |   |                   |   |                  |   |
| 125                                  | P05387 | 60S acidic ribosomal protein P2                 | SRP-dependent cotranslational protein targeting to membrane                       | 1.12<br>(± 0.23) | 3 | 1.75<br>(± 2.03)  | 2 | 5.37<br>(± 0.45) | 2 |
| 126                                  | P68104 | Elongation factor 1-alpha 1                     | GTP catabolic process                                                             | 2.29<br>(± 0.98) | 2 | 1.55<br>(± 0.54)  | 3 |                  |   |
| 127                                  | P30040 | Endoplasmic reticulum protein                   | intracellular protein                                                             | 0.94             | 3 | 0.23              | 2 | 1.49             | 2 |

|                         |        |                                           |                                                             |                  |   |                  |   |                   |   |
|-------------------------|--------|-------------------------------------------|-------------------------------------------------------------|------------------|---|------------------|---|-------------------|---|
|                         |        | ERp29                                     | transport                                                   | (± 0.15)         |   | (± 0.08)         |   | (± 0.16)          |   |
| 128                     | P05386 | 60S acidic ribosomal protein P1           | SRP-dependent cotranslational protein targeting to membrane | 1.66<br>(± 0.82) | 3 | 0.69<br>(± 0.07) | 2 | 0.98<br>(± 0.25)  | 2 |
| 129                     | Q05639 | Elongation factor 1-alpha 2               | GTP catabolic process                                       | 2.27<br>(± 0.11) | 2 |                  |   |                   |   |
| 130                     | Q5VTE0 | Putative elongation factor 1-alpha-like 3 | GTP catabolic process                                       | 0.91<br>(± 0.04) | 2 | 0.48<br>(± 0.48) | 2 | 0.98<br>(± 0.01)  | 3 |
| 131                     | P23396 | 40S ribosomal protein S3                  | SRP-dependent cotranslational protein targeting to membrane | 2.33<br>(± 0.31) | 2 | 4.19<br>(± 5.3)  | 2 | 0.12<br>(± 0.007) | 2 |
| 132                     | P62913 | 60S ribosomal protein L11                 | SRP-dependent cotranslational protein targeting to membrane |                  |   | 1.62<br>(± 0.02) | 2 |                   |   |
| 133                     | Q02878 | 60S ribosomal protein L6                  | SRP-dependent cotranslational protein targeting to membrane |                  |   | 1.9<br>(± 0.34)  | 2 |                   |   |
| 134                     | P39019 | 40S ribosomal protein S19                 | SRP-dependent cotranslational protein targeting to membrane |                  |   | 0.62<br>(±0.15)  | 2 |                   |   |
| Metabolic pathways      |        |                                           |                                                             |                  |   |                  |   |                   |   |
| Carbohydrate metabolism |        |                                           |                                                             |                  |   |                  |   |                   |   |
| Glycolysis              |        |                                           |                                                             |                  |   |                  |   |                   |   |
| 135                     | P06733 | Alpha-enolase                             | glycolysis                                                  | 0.63<br>(± 0.08) | 3 | 0.4<br>(± 0.26)  | 3 | 0.54<br>(± 0.05)  | 3 |
| 136                     | P14618 | Pyruvate kinase isozymes M1/M2            | glycolysis                                                  | 0.7<br>(± 0.02)  | 3 | 0.4<br>(± 0.27)  | 3 | 0.54<br>(± 0.21)  | 3 |
| 137                     | P04075 | Fructose-bisphosphate aldolase A          | glycolysis                                                  | 0.74<br>(± 0.03) | 3 | 0.32<br>(± 0.21) | 3 | 0.5<br>(± 0.03)   | 3 |

|                                                        |        |                                                   |                                   |                  |   |                   |   |                   |   |
|--------------------------------------------------------|--------|---------------------------------------------------|-----------------------------------|------------------|---|-------------------|---|-------------------|---|
| 138                                                    | P04406 | Glyceraldehyde-3-phosphate dehydrogenase          | glycolysis                        | 0.96<br>(± 0.02) | 3 | 1.66<br>(± 0.37)  | 3 | 0.96<br>(± 0.04)  | 3 |
| 139                                                    | P00558 | Phosphoglycerate kinase 1                         | gluconeogenesis                   | 1<br>(± 0.04)    | 3 | 1.01<br>(± 0.3)   | 3 | 0.42<br>(± 0.12)  | 3 |
| 140                                                    | P60174 | Triosephosphate isomerase                         | gluconeogenesis                   | 0.76<br>(± 0.02) | 3 | 1.5<br>(± 0.09)   | 3 | 0.96<br>(± 0.005) | 3 |
| 141                                                    | P18669 | Phosphoglycerate mutase 1                         | gluconeogenesis                   | 0.9<br>(± 0.01)  | 2 | 0.23<br>(± 0.16)  | 2 |                   |   |
| 142                                                    | P15259 | Phosphoglycerate mutase 2                         | glycolysis                        |                  |   |                   |   | 0.68<br>(± 0.13)  | 2 |
| TCA cycle and electron transport chain                 |        |                                                   |                                   |                  |   |                   |   |                   |   |
| 143                                                    | P40926 | Malate dehydrogenase, mitochondrial               | NADH metabolic process            | 0.51<br>(± 0.06) | 3 | 0.97<br>(± 0.04)  | 3 | 1.7<br>(± 0.15)   | 3 |
| 144                                                    | O75390 | Citrate synthase, mitochondrial                   | tricarboxylic acid cycle          |                  |   | 0.62<br>(±0.31)   | 3 | 1.02<br>(±0.06)   | 2 |
| 145                                                    | P07954 | Fumarate hydratase, mitochondrial                 | tricarboxylic acid cycle          | 0.99<br>(± 0)    | 2 | 1.77<br>(± 0.104) | 2 | 1.32<br>(± 0.04)  | 2 |
| Beta oxidation of fatty acid and fatty acid metabolism |        |                                                   |                                   |                  |   |                   |   |                   |   |
| 146                                                    | Q16698 | 2,4-dienoyl-CoA reductase, mitochondrial          | fatty acid beta-oxidation         | 2.06<br>(± 0.98) | 3 | 1.13<br>(± 0.02)  | 2 | 1.26<br>(± 0.46)  | 2 |
| 147                                                    | Q6JQN1 | Acyl-CoA dehydrogenase family member 10           | acyl-CoA dehydrogenase activity   | 7<br>(± 2.93)    | 2 |                   |   |                   |   |
| 148                                                    | P40939 | Trifunctional enzyme subunit alpha, mitochondrial | cardiolipin acyl-chain remodeling |                  |   | 1.56<br>(± 0.54)  | 3 | 0.99<br>(± 0)     | 2 |
| Pentose phosphate shunt                                |        |                                                   |                                   |                  |   |                   |   |                   |   |
| 149                                                    | P29401 | Transketolase                                     | pentose-phosphate shunt           | 0.86<br>(± 0.09) | 3 | 1.03<br>(± 0.03)  | 3 | 0.52<br>(± 0.39)  | 3 |
| 150                                                    | P37837 | Transaldolase                                     | xylulose biosynthetic process     | 0.89<br>(±0.13)  | 2 | 1.2<br>(±0.05)    | 3 |                   |   |

| Energy metabolism        |        |                                                             |                                         |                   |   |                   |   |                  |   |
|--------------------------|--------|-------------------------------------------------------------|-----------------------------------------|-------------------|---|-------------------|---|------------------|---|
| 151                      | P06576 | ATP synthase subunit beta, mitochondrial                    | ATP hydrolysis coupled proton transport | 0.47<br>(± 0.12)  | 3 | 1.24<br>(± 0.11)  | 3 | 3.1<br>(± 0.89)  | 3 |
| 152                      | P25705 | ATP synthase subunit alpha, mitochondrial                   | ATP hydrolysis coupled proton transport | 1.02<br>(±0.02)   | 3 | 0.58<br>(±0.20)   | 3 | 0.83<br>(±0.03)  | 3 |
| 153                      | P13804 | Electron transfer flavoprotein subunit alpha, mitochondrial | respiratory electron transport chain    | 0.66<br>(±0.08)   | 3 | 1.04<br>(±0.05)   | 3 | 0.75<br>(±0.07)  | 3 |
| 154                      | P22695 | Cytochrome b-c1 complex subunit 2, mitochondrial            | oxidative phosphorylation               | 1.31<br>(± 0.69)  | 2 | 1.71<br>(± 0.01)  | 2 |                  |   |
| Other metabolic pathways |        |                                                             |                                         |                   |   |                   |   |                  |   |
| 155                      | P23141 | Liver carboxylesterase 1                                    | response to toxic substance             | 0.49<br>(± 0.08)  | 3 | 1.45<br>( ± 0.81) | 3 | 1<br>(± 0.02)    | 3 |
| 156                      | P23368 | NAD-dependent malic enzyme, mitochondrial                   | malate metabolic process                | 1.02<br>(± 0.05)  | 2 | 1.9<br>(± 0.69)   | 2 |                  |   |
| 157                      | P07686 | Beta-hexosaminidase subunit beta                            | carbohydrate metabolic process          |                   |   | 0.64<br>(±0.06)   | 2 |                  |   |
| 158                      | P22570 | NADPH:adrenodoxin oxidoreductase, mitochondrial             | NADPH oxidation                         | 3.28<br>(± 0.25)  | 2 |                   |   |                  |   |
| 159                      | Q9BZ23 | Pantothenate kinase 2, mitochondrial                        | coenzyme A biosynthetic process         |                   |   | 0.54<br>(± 0.03)  | 2 |                  |   |
| 160                      | Q32M88 | Acid trehalase-like protein 1                               | carbohydrate metabolic process          |                   |   | 0.62<br>(±0.15)   | 2 |                  |   |
| Cytoskeleton             |        |                                                             |                                         |                   |   |                   |   |                  |   |
| 161                      | Q13748 | Tubulin alpha-3C/D chain                                    | microtubule-based process               | 6.43<br>( ± 2.13) | 2 | 0.65<br>(± 0.37)  |   |                  |   |
| 162                      | P07737 | Profilin-1                                                  | actin cytoskeleton organization         | 0.85<br>(± 0.05)  | 3 | 1.03<br>(± 0.09)  | 3 | 0.51<br>(± 0.16) | 3 |
| 163                      | P26038 | Moesin                                                      | leukocyte cell-cell                     | 0.62              | 3 | 0.37              | 3 | 0.64             | 3 |

|     |        |                                                      |                                                                                |          |   |          |   |           |   |
|-----|--------|------------------------------------------------------|--------------------------------------------------------------------------------|----------|---|----------|---|-----------|---|
|     |        |                                                      | adhesion                                                                       | (± 0.05) |   | (± 0.09) |   | (± 0.14)  |   |
| 164 | P13796 | Plastin-2                                            | T cell activation                                                              | 1.53     | 3 | 0.73     | 3 | 0.51      | 3 |
|     |        |                                                      | involved in immune response                                                    | (± 0.35) |   | (± 0.14) |   | (± 0.11)  |   |
| 165 | Q9Y490 | Talin-1                                              | activation of signaling protein activity involved in unfolded protein response | 0.99     | 2 | 0.92     | 3 | 0.5       | 3 |
|     |        |                                                      |                                                                                | (± 0)    |   | (± 0.02) |   | (± 0.39)  |   |
| 166 | P40121 | Macrophage-capping protein                           | barbed-end actin filament capping                                              |          |   | 0.53     | 3 | 0.99      | 3 |
|     |        |                                                      |                                                                                |          |   | (± 0.18) |   | (± 0.005) |   |
| 167 | P68371 | Tubulin beta-2C chain                                | microtubule-based process                                                      | 4.59     | 3 | 3.54     | 2 |           |   |
|     |        |                                                      |                                                                                | (± 1.69) |   | (± 0.36) |   |           |   |
| 168 | P42167 | Lamina-associated polypeptide 2, isoforms beta/gamma | nuclear envelope                                                               | 0.55     | 2 |          |   |           |   |
|     |        |                                                      |                                                                                | (± 0.39) |   |          |   |           |   |
| 169 | P60709 | Actin, cytoplasmic 1                                 | 'de novo' posttranslational protein folding                                    | 0.96     | 2 |          |   | 0.28      | 2 |
|     |        |                                                      |                                                                                | (± 0.03) |   |          |   | (± 0.17)  |   |
| 170 | Q9BQE3 | Tubulin alpha-1C chain                               | cytoskeleton-dependent intracellular transport                                 | 5.6      | 3 | 1.25     | 2 |           |   |
|     |        |                                                      |                                                                                | (± 4.12) |   | (± 0.01) |   |           |   |
| 171 | Q5TZA2 | Rootletin                                            | centrosome organization                                                        | 4.5      | 2 |          |   |           |   |
|     |        |                                                      |                                                                                | (± 1.32) |   |          |   |           |   |
| 172 | P02545 | Lamin-A/C                                            | M phase of mitotic cell cycle                                                  | 1.03     | 3 | 2.39     | 2 | 2.47      | 3 |
|     |        |                                                      |                                                                                | (± 0.08) |   | (± 0.32) |   | (± 1.35)  |   |
| 173 | Q8N3T6 | Transmembrane protein 132C                           | integral to membrane                                                           | 1.84     | 2 |          |   |           |   |
|     |        |                                                      |                                                                                | (± 0.08) |   |          |   |           |   |
| 174 | P12109 | Collagen alpha-1(VI) chain                           | cell adhesion                                                                  | 5.87     | 2 |          |   |           |   |
|     |        |                                                      |                                                                                | (± 1.29) |   |          |   |           |   |
| 175 | P27816 | Microtubule-associated protein 4                     | cell division and establishment of spindle                                     | 0.77     | 2 |          |   | 3.92      | 2 |
|     |        |                                                      |                                                                                | (± 0.24) |   |          |   | (± 0.73)  |   |

|     |        |                                           | orientation                                    |                  |   |                   |                  |                 |   |
|-----|--------|-------------------------------------------|------------------------------------------------|------------------|---|-------------------|------------------|-----------------|---|
| 176 | P04264 | Keratin, type II cytoskeletal 1           | complement activation                          | 0.1<br>(± 0.01)  | 2 | 2.7<br>(± 1.48)   | 3                |                 |   |
| 177 | P06753 | Tropomyosin alpha-3 chain                 | muscle filament sliding                        | 0.36<br>(± 0.34) | 3 |                   |                  |                 |   |
| 178 | P35908 | Keratin, type II cytoskeletal 2 epidermal | keratinization                                 | 0.29<br>(± 0.34) | 2 | 1.91<br>(± 0.38)  | 2                |                 |   |
| 179 | Q9Y4G6 | Talin-2                                   | cytoskeletal anchoring at plasma membrane      | 2.0<br>(± 0.59)  | 2 |                   |                  |                 |   |
| 180 | Q2KHT4 | Germ cell-specific gene 1 protein         | integral to membrane                           | 2.08<br>(± 0.40) | 2 |                   |                  |                 |   |
| 181 | Q14019 | Coactosin-like protein                    | defense response to fungus                     | 0.99<br>(± 0)    | 2 | 0.52<br>(± 0.006) | 2                |                 |   |
| 182 | P23528 | Cofilin-1                                 | Rho protein signal transduction                | 0.85<br>(± 0.26) | 2 | 0.52<br>(± 0.006) | 2                |                 |   |
| 183 | O43312 | Metastasis suppressor protein 1           | actin cytoskeleton organization                | 3.61<br>(± 1.53) | 2 |                   |                  |                 |   |
| 184 | P35527 | Keratin, type I cytoskeletal 9            | intermediate filament organization             | 0.91<br>(± 0.14) | 2 | 3.29<br>(± 2.0)   | 3                |                 |   |
| 185 | P13645 | Keratin, type I cytoskeletal 10           | cellular response to calcium ion               |                  |   |                   | 4<br>(± 0.39)    | 2               |   |
| 186 | P04350 | Tubulin beta-4 chain                      | microtubule-based process                      |                  |   |                   | 0.55<br>(± 0.03) | 2               |   |
| 187 | P68363 | Tubulin alpha-1B chain                    | cytoskeleton-dependent intracellular transport |                  |   |                   | 0.55<br>(± 0.08) | 2               |   |
| 188 | P05107 | Integrin beta-2                           | cell-cell signaling                            | 0.99<br>(±0.00)  | 2 | 1.03<br>(±0.03)   | 2                | 0.64<br>(±0.06) | 2 |
| 189 | P07437 | Tubulin beta chain                        | cellular component                             | 0.85             | 2 | 0.9               | 3                | 0.63            | 3 |

|                                |        |                                          |                                                              |                  |   |                  |   |                 |   |
|--------------------------------|--------|------------------------------------------|--------------------------------------------------------------|------------------|---|------------------|---|-----------------|---|
|                                |        |                                          | movement                                                     | (±0.16)          |   | (±0.24)          |   | (±0.33)         |   |
| 190                            | P12814 | Alpha-actinin-1                          | actin crosslink formation                                    |                  |   | 1.37<br>(±0.26)  | 3 | 0.66<br>(±0.02) | 3 |
| 191                            | P63261 | Actin, cytoplasmic 2                     | Fc-gamma receptor signaling pathway involved in phagocytosis | 0.84<br>(±0.13)  | 3 | 0.78<br>(±0.08)  | 3 | 0.67<br>(±0.16) | 3 |
| 192                            | P06396 | Gelsolin                                 | actin filament polymerization                                | 0.84<br>(±0.13)  | 3 | 0.98<br>(±0.01)  | 3 | 0.67<br>(±0.21) | 3 |
| Proteins with unknown function |        |                                          |                                                              |                  |   |                  |   |                 |   |
| 193                            | Q5JR59 | Uncharacterized protein KIAA0774         |                                                              | 1.54<br>(± 0.18) | 2 |                  |   |                 |   |
| 194                            | Q5TEA3 | Uncharacterized protein C20orf194        |                                                              |                  |   | 0.4<br>(± 0.01)  | 2 |                 |   |
| 195                            | Q5RHP9 | Uncharacterized protein C1orf173         |                                                              |                  |   | 2.17<br>(± 0.89) | 2 |                 |   |
| 196                            | Q12767 | Uncharacterized protein KIAA0195         |                                                              |                  |   | 0.5<br>(± 0.009) | 2 |                 |   |
| 197                            | Q8WVS4 | WD repeat-containing protein 60          |                                                              |                  |   | 3.1<br>(± 0.504) | 2 |                 |   |
| 198                            | Q8NA72 | Uncharacterized protein C5orf37          |                                                              | 14.3<br>(± 6.96) | 2 |                  |   |                 |   |
| 199                            | Q9H2F9 | Coiled-coil domain-containing protein 68 |                                                              | 11.2<br>(±1.31)  | 2 |                  |   |                 |   |

The parameters that were used for identification and quantification of differentially modulated proteins included: (1) proteins identified having 95% confidence (Unused-Prot Score > 1.3); (2) proteins with fold differences 1.5 or 0.67 were considered more abundant and less abundant respectively and (3) protein detected in a minimum of two technical replicates.

R: no. of replicate experiment. Fold represents fold abundance (higher/lower) in infected *versus* uninfected THP-1 cells. \*nearest fold ratio for threshold cut off.
